# Supplementary material
Source: MDPI journal article supplement (https://www.mdpi.com/2673-5636/2/2/19)
Supplement: s1 [file s1]

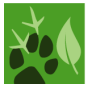

# Supplementary Materials: Activity, Social Relationships, and Maternal Care in a Bottlenose Dolphin Group Under Professional Care

**Table S1.** Swim State Operational Definitions.

| Swim State                | Category | Definition                                                                                                                      |
|---------------------------|----------|---------------------------------------------------------------------------------------------------------------------------------|
| Solitary Swim             | Solitary | Dolphin swims independently, not synchronous with any conspecific                                                               |
| Solitary Surface Resting  | Solitary | Dolphin remains stationary at the surface of the water column independently                                                     |
| Solitary Bottom Resting   | Solitary | Dolphin remains stationary at the bottom of the water column independently                                                      |
| Solitary Vertical Resting | Solitary | Dolphin remains stationary while positioned vertically in the water column                                                      |
| Solitary Wall Swim        | Solitary | Dolphin swims with a pectoral fin and/or dorsal fin near the wall, using it as a guide                                          |
| Group Swim                | Social   | Three or more dolphins (not including a mother/calf dyad) swimming synchronously within one dolphin-body-length (approx. 2.5 m) |
| Group Swim with Calf      | Social   | Three or more dolphins including a mother/calf dyad swimming synchronously within one dolphin-body-length (approx. 2.5 m)       |
| Group Surface Resting     | Social   | Three or more dolphins remain stationary at the surface of the water column within one dolphin-body-length (approx. 2.5 m)      |
| Group Bottom Resting      | Social   | Three or more dolphins remain stationary at the bottom of the water column within one dolphin-body-length (approx. 2.5 m)       |
| Mother-Calf Swim          | Social   | Mother/calf dyad swimming synchronously within one dolphin-body-length (approx. 2.5 m)                                          |
| Group Social Swim         | Social   | Three or more dolphins interacting non-synchronously within one dolphin-body-length (approx. 2.5 m; e.g., play)                 |
| Pair Social Swim          | Social   | Two dolphins interacting non-synchronously within one dolphin-body-length (approx. 2.5 m; e.g., play)                           |
| Pair Swim                 | Social   | Two dolphins (not a mother/calf dyad) swimming synchronously within one dolphin-body-length (approx. 2.5 m)                     |
| Pair Surface Resting      | Social   | Two dolphins remain stationary at the surface of the water column within one dolphin-body-length (approx. 2.5 m)                |
| Pair Bottom Resting       | Social   | Two dolphins remain stationary at the bottom of the water column within one dolphin-body-length (approx. 2.5 m)                 |
| Out of Sight              | N/A      | Dolphin is out of view                                                                                                          |

**Table S2.** Behavior Event Operational Definitions.

| Behavior            | Category | Type      | Definition                                                                                           |
|---------------------|----------|-----------|------------------------------------------------------------------------------------------------------|
| Beach               | Solitary | Active    | Dolphin slides more than one-third of its body onto the slide out                                    |
| Bite/Rake           | Social   | Agonistic | Dolphin forcefully rubs its teeth or closes mouth around another dolphin                             |
| Bite/Rake Recipient | Social   | Agonistic | Another dolphin rubs its teeth or closes its mouth with force around the focal dolphin               |
| Bow                 | Solitary | Active    | Dolphin fully jumps out of the water and re-enters the water head first                              |
| Breach              | Solitary | Active    | Dolphin fully jumps out of the water and re-enters the water on its lateral side                     |
| Bubble Burst        | Solitary | Active    | Dolphin produces large bubble/bubbles from the blowhole similar to those produced by scuba equipment |
| Bubble Ring         | Solitary | Active    | Dolphin produces bubbles in the shape of a ring from the blowhole                                    |

|                              |          |           |                                                                                                                                                                                                |
|------------------------------|----------|-----------|------------------------------------------------------------------------------------------------------------------------------------------------------------------------------------------------|
| Bubble Trail                 | Solitary | Active    | Dolphin produces a series of small bubbles from the blowhole that form a trail                                                                                                                 |
| Chase                        | Social   | Active    | Rapid and persistent pursuit of another dolphin                                                                                                                                                |
| Erection                     | Social   | Sexual    | Dolphin's penis is visible                                                                                                                                                                     |
| Flee                         | Social   | Active    | Abrupt, rapid, and immediate departure in response to the actions of another dolphin                                                                                                           |
| Fluke Slap                   | Solitary | Active    | Dolphin slaps the surface of the water with its flukes in a quick manner                                                                                                                       |
| Fluke Splash                 | Solitary | Active    | Dolphin swims ventral side up near the surface of the water and splashes water upward with their flukes                                                                                        |
| Genital Rub                  | Social   | Sexual    | Dolphin rubs the genital area of another dolphin with any part of their body other than their rostrum or genitals                                                                              |
| Genital Rub Recipient        | Social   | Sexual    | Another dolphin rubs the genital area of the focal dolphin with any part of their body other than their rostrum or genitals                                                                    |
| Goosing/ Push-Up             | Social   | Sexual    | Dolphin inspects or contacts the genital area of another dolphin with their rostrum                                                                                                            |
| Goosing/ Push-Up Recipient   | Social   | Sexual    | Another dolphin inspects or contacts the genital area of the focal dolphin with their rostrum                                                                                                  |
| Group Social Ball            | Social   | Sexual    | Three or more dolphins rapidly swim around each other and appear to be "wrestling"                                                                                                             |
| Head Jerk                    | Social   | Agonistic | Dolphin abruptly moves their head vertically or horizontally                                                                                                                                   |
| Head Jerk Recipient          | Social   | Agonistic | Another dolphin abruptly moves their head vertically or horizontally in the direction of the focal dolphin                                                                                     |
| Herd                         | Social   | Agonistic | Dolphin is directing another dolphin's movements from behind                                                                                                                                   |
| Herd Recipient               | Social   | Agonistic | Another dolphin is directing the focal dolphin's movements from behind                                                                                                                         |
| Hit                          | Social   | Active    | Dolphin contacts another dolphin using their rostrum or fluke in a quick manner                                                                                                                |
| Hit Recipient                | Social   | Active    | Another dolphin contacts the focal dolphin with their rostrum or fluke in a quick manner                                                                                                       |
| Interact With Object         | Solitary | Active    | Dolphin independently interacts with an object                                                                                                                                                 |
| Interact With Habitat Object | Solitary | Active    | Dolphin independently interacts with a part of the habitat (e.g., gate or outflow pipe)                                                                                                        |
| Interact With Trainer        | Solitary | Active    | Dolphin independently interacts with or visually inspects a trainer                                                                                                                            |
| Interact With Bubble         | Solitary | Active    | Dolphin independently interacts with bubbles or moving water                                                                                                                                   |
| Interact With Researcher     | Solitary | Active    | Dolphin independently visually inspects a researcher at an underwater viewing window                                                                                                           |
| Interact With Guest          | Solitary | Active    | Dolphin independently visually inspects or interacts with guest at an underwater viewing window                                                                                                |
| Jaw Pop                      | Social   | Agonistic | Dolphin produces a loud popping sound coupled with a fast open and close of the mouth                                                                                                          |
| Jaw Pop Recipient            | Social   | Agonistic | Another dolphin produces a loud popping sound coupled with a fast open and close of the mouth in the direction of the focal dolphin                                                            |
| Mount Habitat                | Solitary | Sexual    | Dolphin mounts a wall, window or floor                                                                                                                                                         |
| Mounting                     | Social   | Sexual    | Dolphin mounts another dolphin by orienting its genital region to another dolphin's genital region or a dolphin inserts another dolphin's dorsal fin in their genital slit                     |
| Mounting Recipient           | Social   | Sexual    | Another dolphin mounts the focal dolphin by orienting its genital region to the focal dolphin's genital region or another dolphin inserts the focal dolphin's dorsal fin in their genital slit |
| Mouthing                     | Social   | Active    | Dolphin has mouth around a conspecific's body, or around an object, but is not biting down                                                                                                     |
| Mouthing Recipient           | Social   | Active    | Focal dolphin has another dolphin's mouth around its body but the dolphin is not biting down                                                                                                   |
| Nursing                      | Social   | Active    | Calf in position near mammary slits with rostrum near/in slits                                                                                                                                 |
| Open Mouth                   | Social   | Active    | Dolphin separates its jaws to expose teeth                                                                                                                                                     |

|                                     |          |        |                                                                                                                                   |
|-------------------------------------|----------|--------|-----------------------------------------------------------------------------------------------------------------------------------|
| Open Mouth Recipient                | Social   | Active | Dolphin is the recipient of another dolphin that separates its jaws to expose teeth                                               |
| Petting                             | Social   | Active | Pectoral fin to pectoral fin rubbing where active movement is observed                                                            |
| Porpoise                            | Solitary | Active | Dolphin jumps partially out of the water (flukes remain in water) and re-enters the water head first                              |
| Social Interact With Object         | Social   | Active | Two or more dolphins simultaneously interact with an object                                                                       |
| Social Interact With Habitat Object | Social   | Active | Two or more dolphins simultaneously interact with a part of the habitat (e.g., gate or outflow pipe)                              |
| Social Interact With Trainer        | Social   | Active | Two or more dolphins simultaneously interact with or visually inspects a trainer                                                  |
| Social Interact With Bubble         | Social   | Active | Two or more dolphins simultaneously interact with bubbles or water                                                                |
| Social Interact With Researcher     | Social   | Active | Two or more dolphins simultaneously participate in close visual inspection of a researcher at an underwater viewing window        |
| Social Interact With Guest          | Social   | Active | Two or more dolphins simultaneously participate in close visual inspection or interact with guest at an underwater viewing window |
| Spy Hop                             | Solitary | Active | Dolphin raises and lowers half of its body out of the water in a vertical position                                                |
| Tactile/ Rub                        | Social   | Active | Dolphin contacts or actively rubs another dolphin a manner that is not considered sexual contact                                  |
| Tactile/ Rub Recipient              | Social   | Active | Another dolphin contacts or actively rubs the focal dolphin a manner that is not considered sexual contact                        |
| Tactile/ Rub Habitat                | Solitary | Active | Dolphin contacts or actively rubs any part of their body on the habitat wall                                                      |
| Tongue                              | Solitary | Active | Dolphin manipulates their own tongue or sticks it out of their mouth                                                              |

---
